# Supplementary material for: Astragaloside regulates lncRNA LOC100912373 and the miR-17-5p/PDK1 axis to inhibit the proliferation of fibroblast-like synoviocytes in rats with rheumatoid arthritis
Source: PubMed Central journal article supplement — Int J Mol Med. 2021 May 17;48(1):130. doi: 10.3892/ijmm.2021.4963 (PMC8136124; doi:10.3892/ijmm.2021.4963), 2021-05-17
Supplement: Supplementary_Data.pdf [file Supplementary_Data.pdf]

Table SI. Sequences of primers used for RT-qPCR.

| Target gene  | Forward and reverse sequence                                     | Product length (bp) |
|--------------|------------------------------------------------------------------|---------------------|
| LOC100912373 | F: 5'-TTGATTGGCAAACCGCTTCA-3'<br>R: 5'-GGCTTGCAATCCATTCGTCT-3'   | 156                 |
| PDK1         | F: 5'-CTGGCTGGATTTGGTTACGG-3'<br>R: 5'-ACTCCGTTGACAGAGCCTTAAT-3' | 133                 |
| AKT          | F: 5'-GCTGGAGAACCTCATGCTG-3'<br>R: 5'-GTGTCCCGCAGAACGTC-3'       | 110                 |
